# Supplementary material for: Normalization of Voltage-Sensitive Dye Signal with Functional Activity Measures
Source: PubMed Central journal article supplement (PMC2612132; doi:10.1371/journal.pone.0004041), 2008-12-24
Supplement: pone.0004041.s001.pdf [file pone.0004041.s001.pdf]

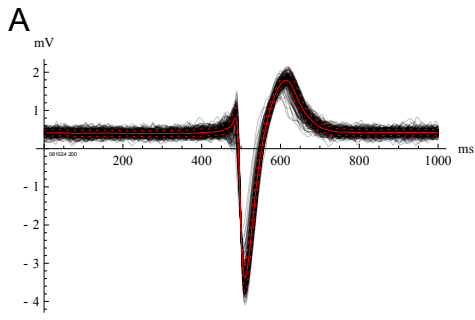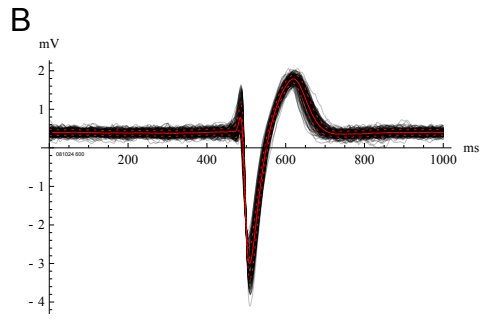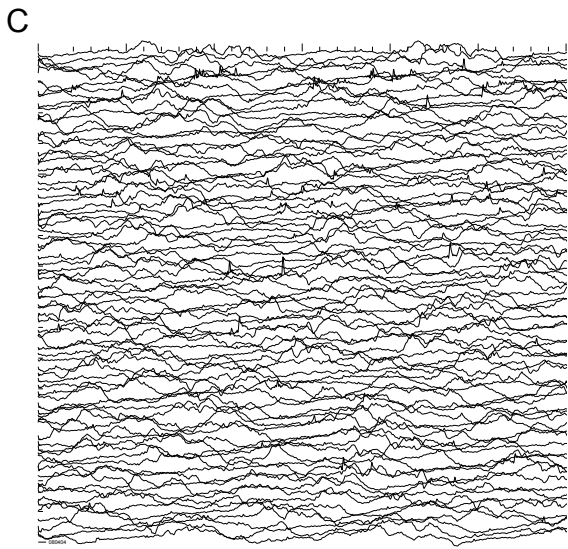

┌ 200 mV  
└ 200 ms
